# Supplementary material
Source: PubMed Central journal article supplement (PMC3047084)
Supplement: cbt1102_0263SD1.pdf [file cbt1102_0263SD1.pdf]

## Supplementary Information

**Title:** Anticancer activity of Celastrol in combination with ErbB2-targeted therapeutics for treatment of ErbB2-overexpressing Breast Cancers.

**Authors:** Srikumar M. Raja<sup>1,4,§</sup>, Robert J. Clubb<sup>1,4,5</sup>, Cesar Ortega-Cava<sup>1,4</sup>, Stetson H. Williams<sup>1</sup>, Tameka A. Bailey<sup>1</sup>, Lei Duan<sup>1,4,5</sup>, Xiangshan Zhao<sup>3,4</sup>, Alagarasamy L. Reddi<sup>4,5</sup>, Abijah M. Nyong<sup>1</sup>, Amarnath Natarajan<sup>1</sup>, Vimla Band<sup>1,3,4</sup> and Hamid Band<sup>1,2,3,4,§</sup>

**Affiliations:** <sup>1</sup>Eppley Institute for Research in Cancer and Allied Diseases; <sup>2</sup>Departments of Biochemistry & Molecular Biology, Pathology & Microbiology and Pharmacology & Neuroscience, and <sup>3</sup>Department of Genetics, Cell Biology and Anatomy, College of Medicine, University of Nebraska Medical Center, Omaha, NE 68198-5950.

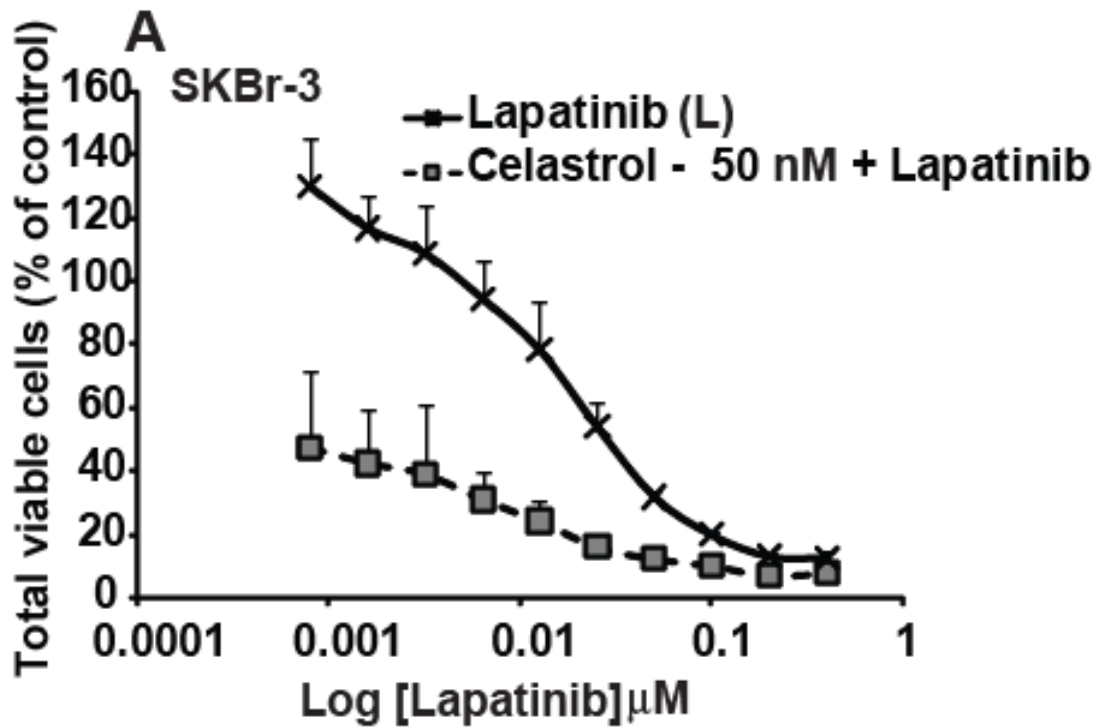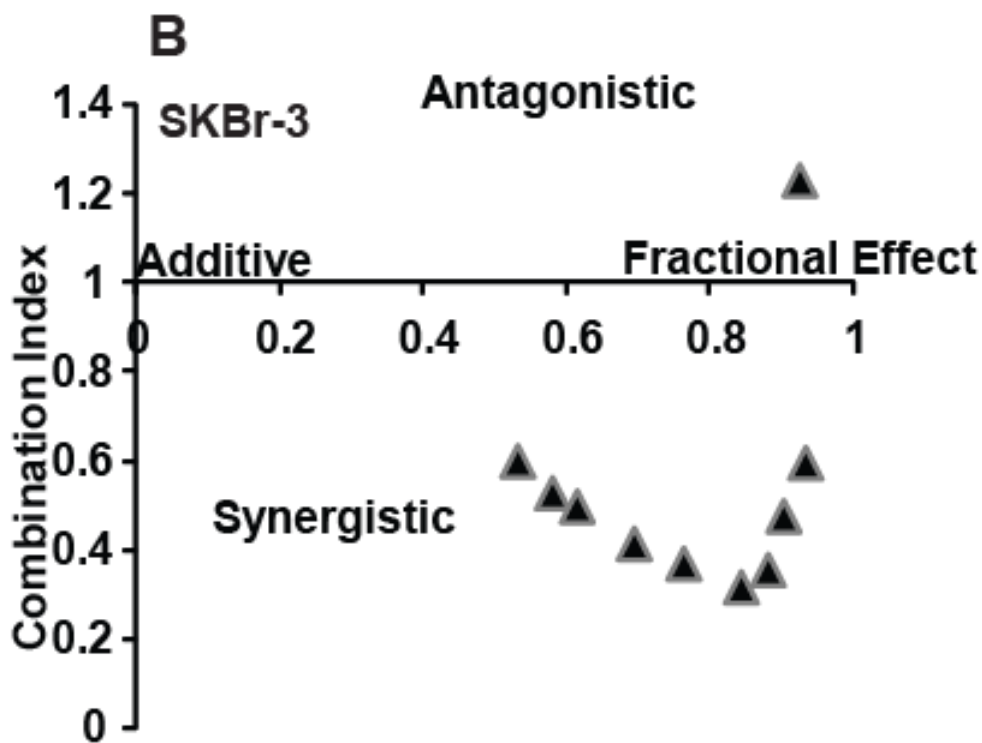

**Supplementary Fig. 1.** *Celastrol plus Lapatinib is synergistic in killing ErbB2-overexpressing SKBr-3 cells:* A. SKBr-3 cells were treated with Celastrol or Lapatinib alone or a combination of fixed concentration of Celastrol (at 50 nM) and varying concentrations of Lapatinib. The viable cells at the end of treatment were assessed using the MTT dye assay and data represented as % of vehicle control. The  $IC_{50}$  for Lapatinib alone was  $25.5 \pm 2.1$  nM, whereas it was  $0.74 \pm 0.1$  nM when combined with Celastrol at 50 nM. The surviving fraction with Celastrol alone at 50 nM was  $69.8 \pm 1.7\%$  of vehicle control. B. Chou-Talalay analysis was performed as detailed in the methods section.

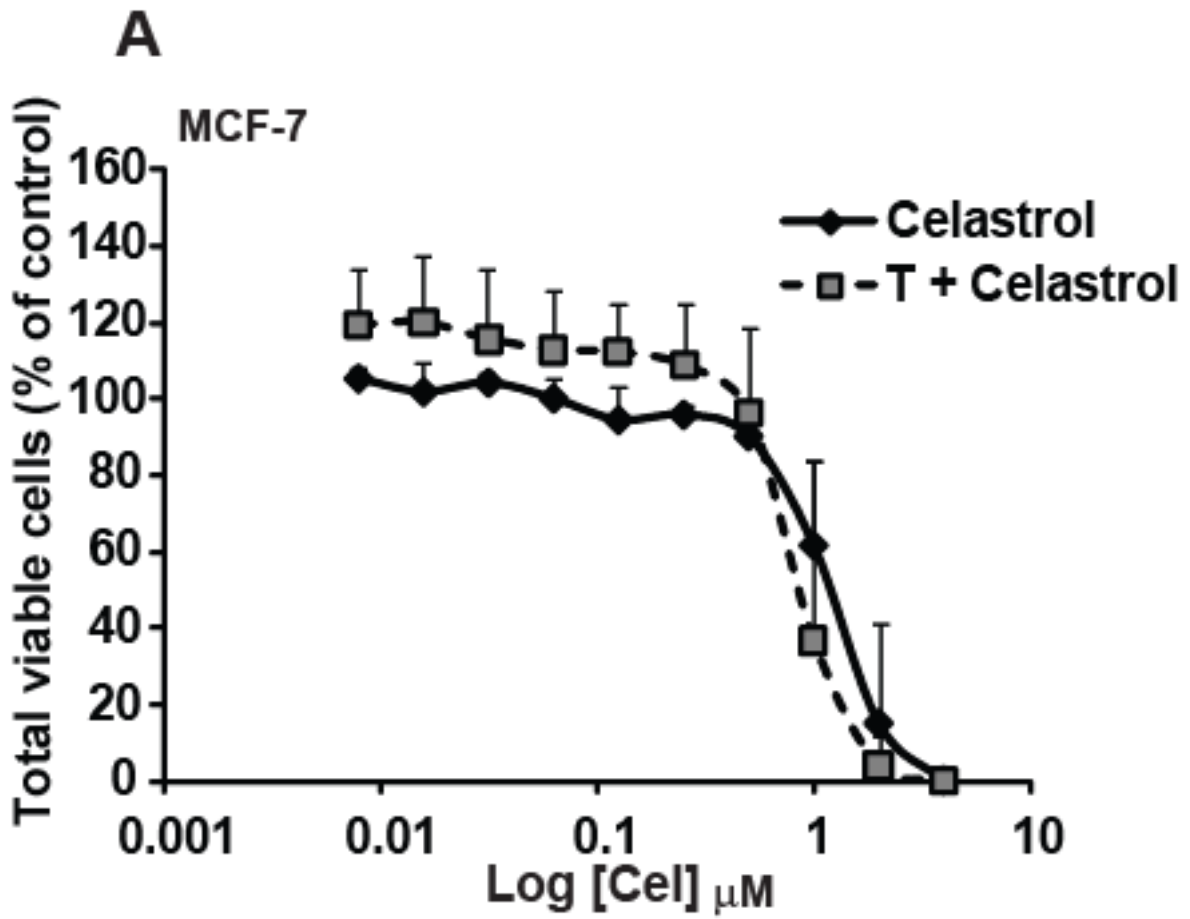

**Supplementary Fig. 2:** *Lack of synergism between Celastrol and Trastuzumab in ErbB2-low MCF-7 cells:* MCF-7 cells were treated with single agents or their combination, as detailed in the legend to Fig. 3. Viable cells at the end of treatment were assessed using the MTT dye assay and data represented as % of vehicle control.

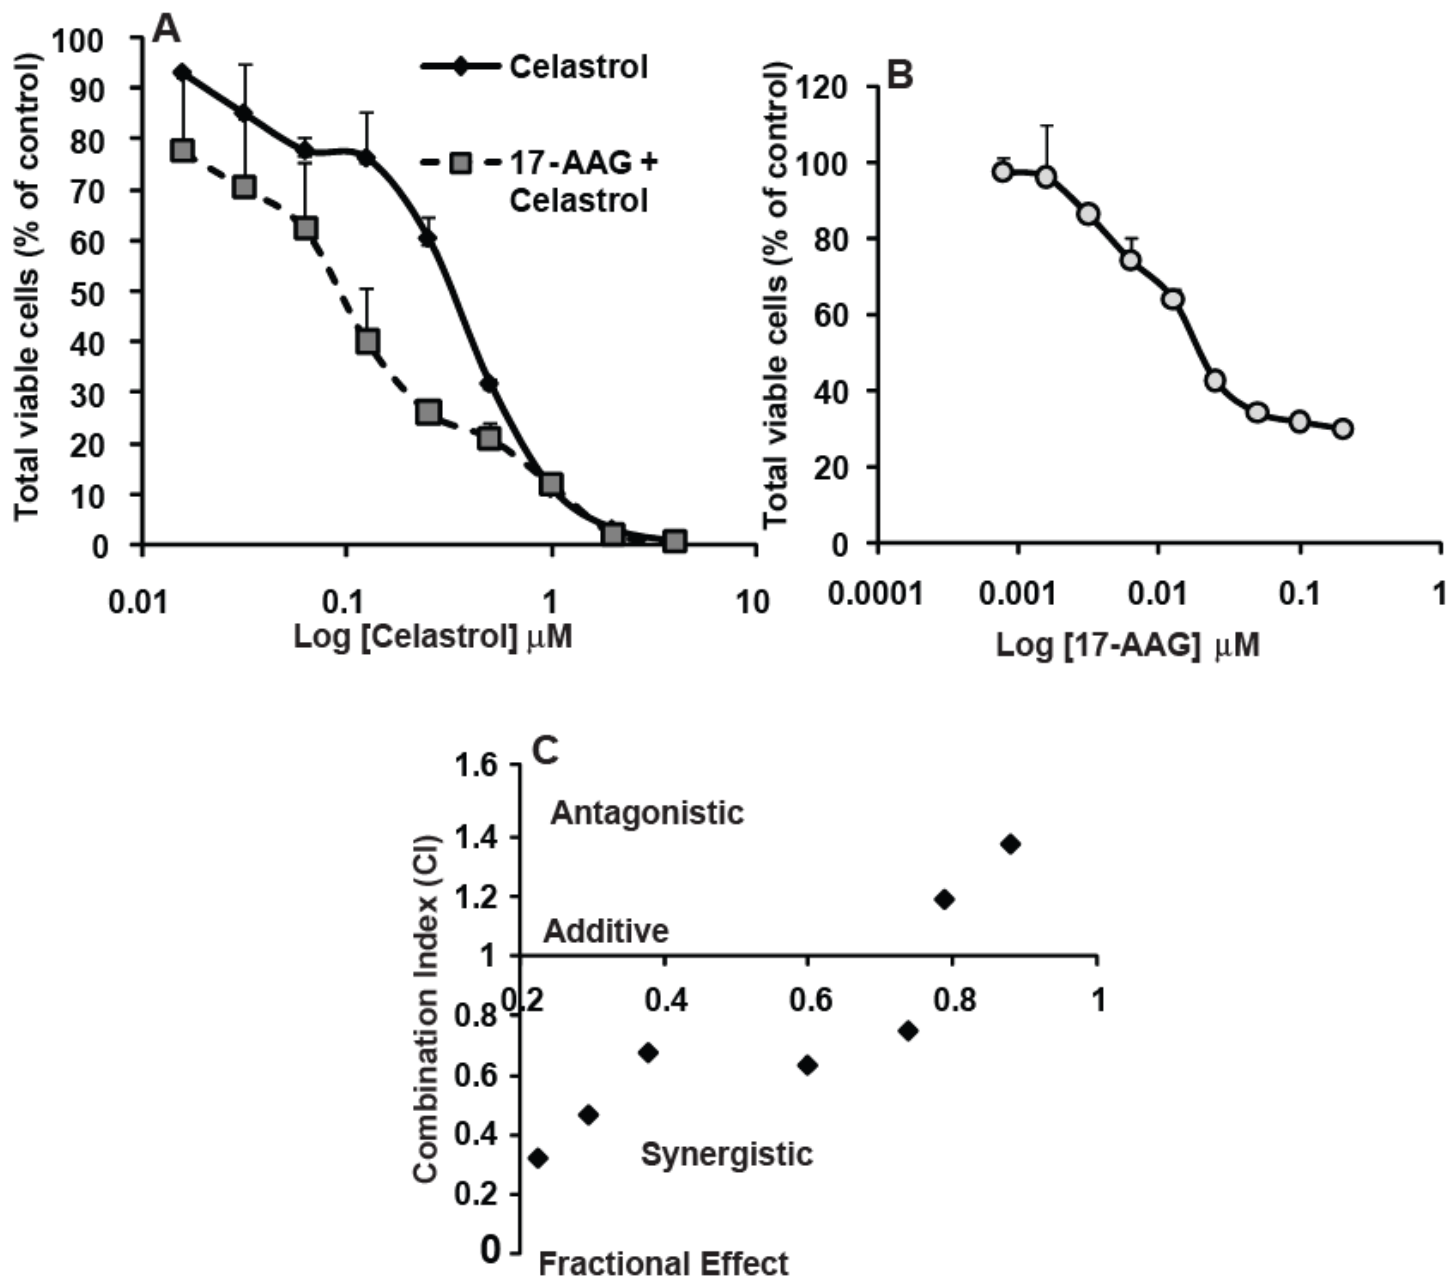

**Supplementary Fig. 3:** Mild synergism between Celastrol and 17-AAG against ErbB2-overexpressing SKBr-3 cell line: Treatments were performed as in legend to Fig. 3. For Celastrol plus 17-AAG combination, both Celastrol and 17-AAG were serially diluted 2-fold at a fixed ratio of 20:1. Total viable cells were assessed using the MTT dye assay after 7 days. The  $\text{IC}_{50}$  for Celastrol was  $0.18 \pm 0.08 \mu\text{M}$  as a single drug versus  $0.078 \pm 0.08 \mu\text{M}$  when combined with 17-AAG. Chou-Talalay analysis is shown in the bottom panel. Combination index (CI) < 1 indicates synergy; CI  $\sim$  1 indicates additive effects; CI > 1 indicates antagonism.

SKBr-3

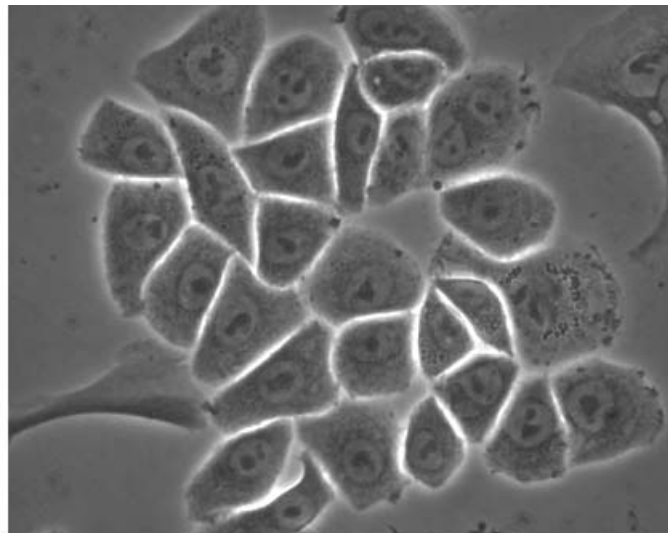

DMSO

Celastrol  
(4  $\mu$ M; 4h)

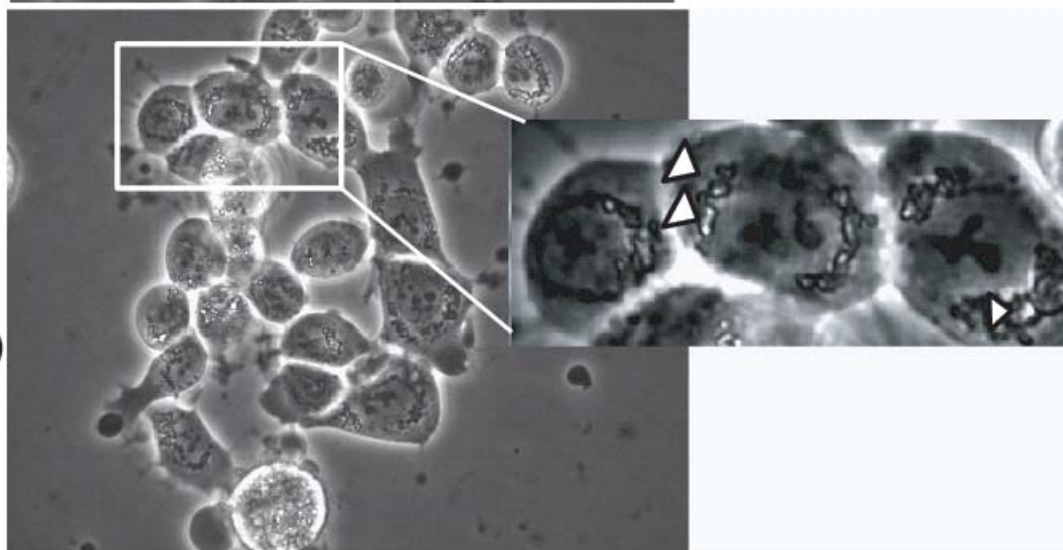

Celastrol  
+ DTT  
(4  $\mu$ M; 4h)

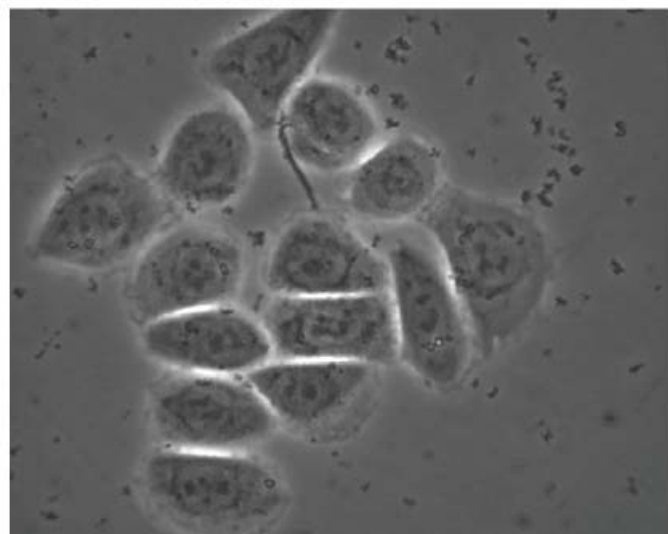

**Supplementary Fig. 4:** *The 'Michael Acceptor' functionality is important for the bioactivity of Celastrol:* Effect of reduction of the  $\alpha,\beta$ -unsaturated carbonyl group by DTT on cell-death in SKBr-3 cells induced by Celastrol; Cells were incubated with the indicated concentrations of untreated or DTT-treated Celastrol for the indicated time. The changes cell morphology was followed by bright field microscope using a 40 X objective. The inset shows induction of vacuolation by Celastrol but not DTT-treated Celastrol.

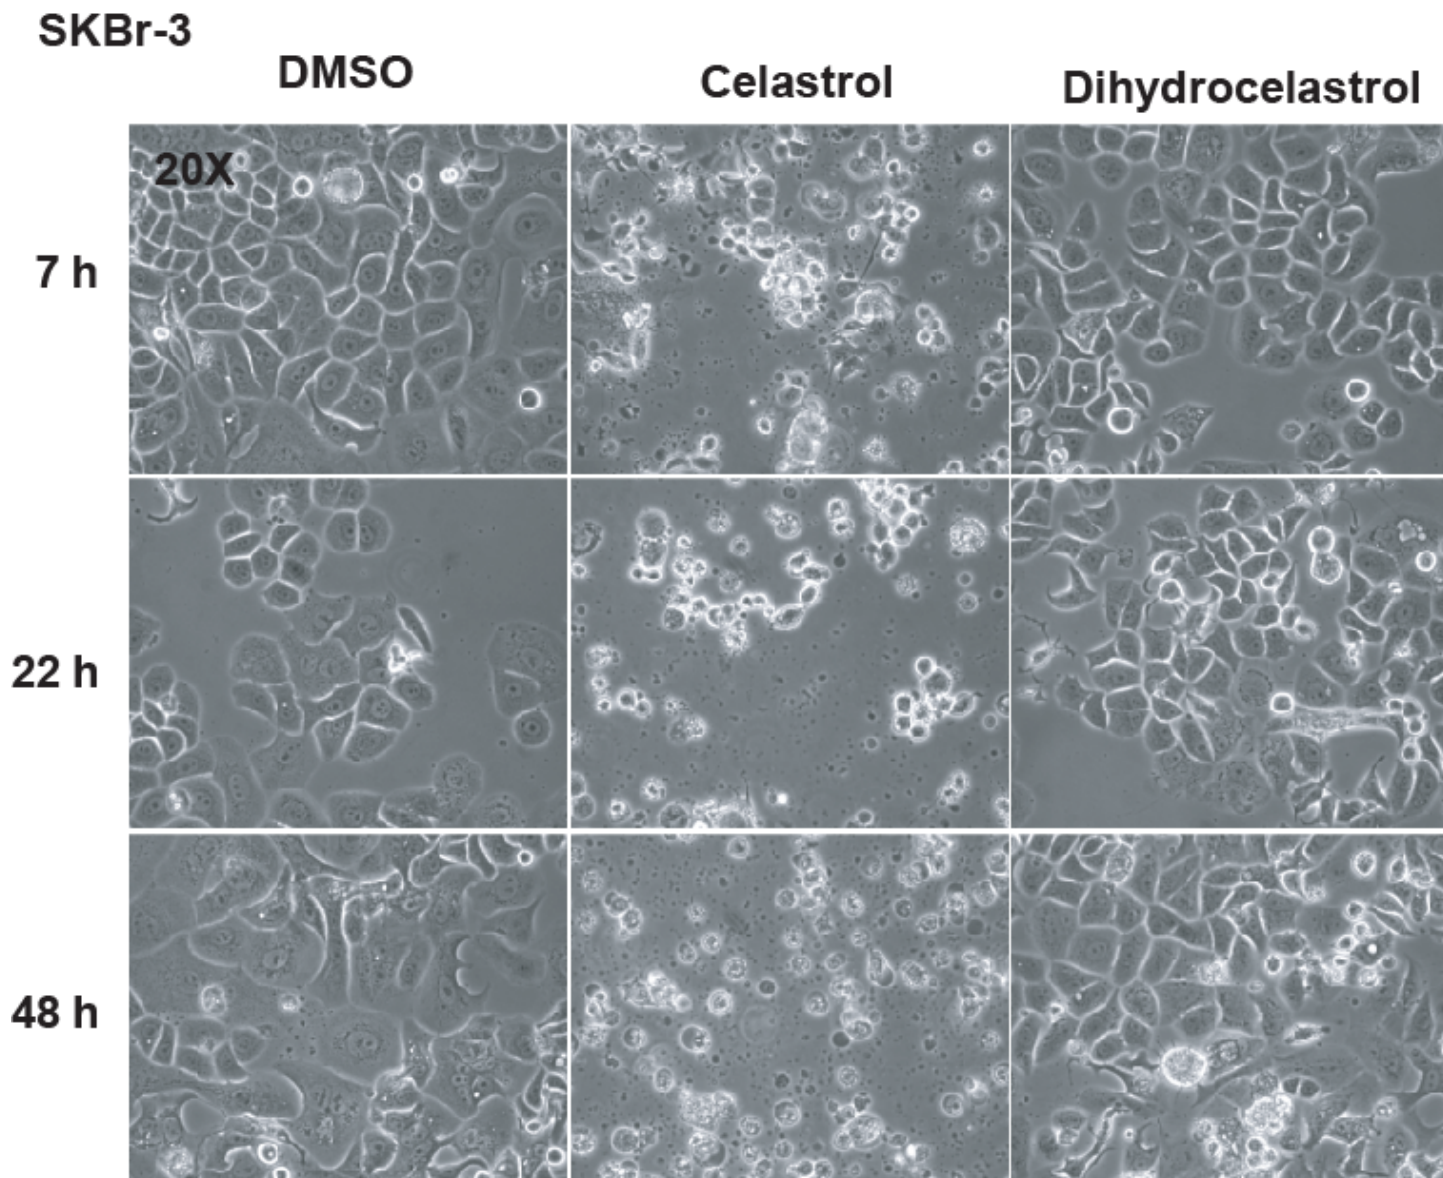

**Supplementary Fig. 5:** *The 'Michael Acceptor' functionality is important for the bioactivity of Celastrol.* Effect of reduction of the  $\alpha,\beta$ -unsaturated carbonyl group on cell-death in SKBr-3 cells induced by Celastrol; Cells were left untreated or incubated with the 4  $\mu$ M Celastrol or Dihydrocelastrol for the indicated time. The changes cell morphology was followed by bright field microscope using a 20 X objective.

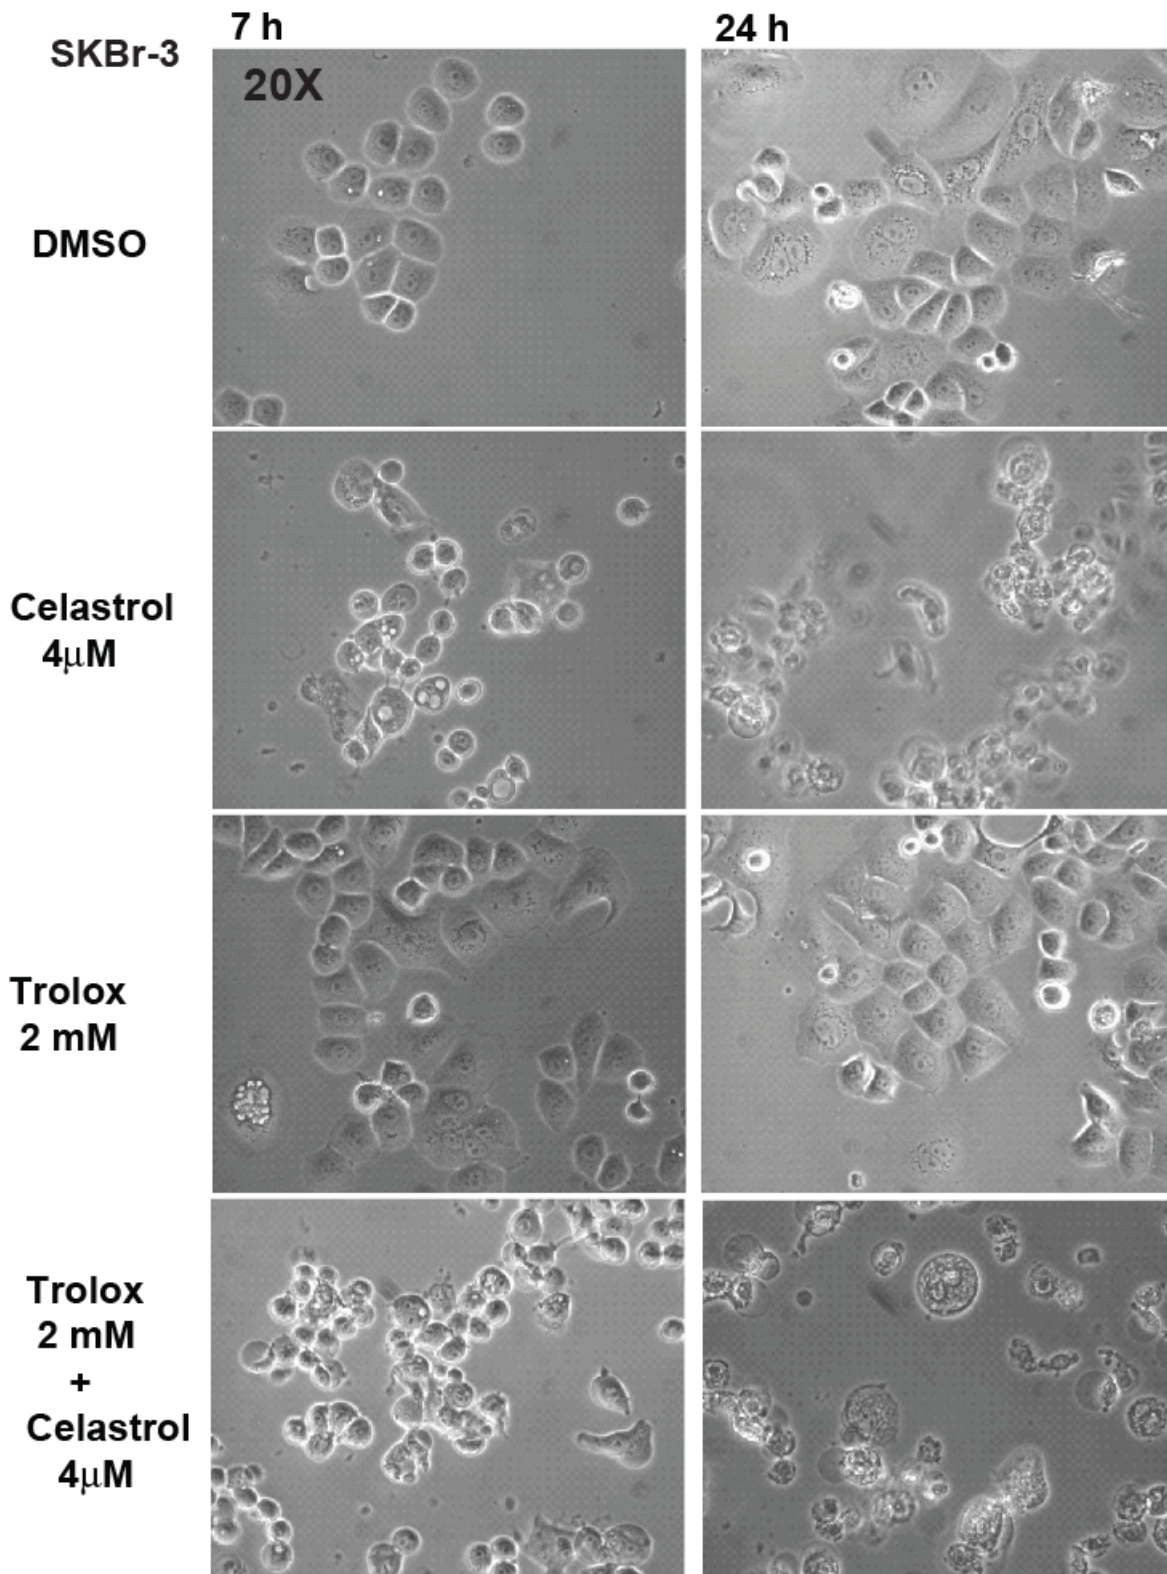

**Supplementary Fig. 6** *Effect of anti-oxidant Trolox on Celastrol induced cell death.* SKBr-3 cells were treated with the indicated concentrations of Celastrol with or without 500-fold excess of Trolox. The cell morphology was monitored at the indicated time periods by a bright field microscope using a 20X magnification objective. Shown here is the effect of anti-oxidants Trolox on the cytotoxicity of Celastrol.

**Supplementary Table 1:** List of antibodies used for this study.

| <b>Antibody</b>           | <b>Species</b>           | <b>Company</b>              | <b>Description</b> | <b>Dilution</b>    | <b>Application</b>                    |
|---------------------------|--------------------------|-----------------------------|--------------------|--------------------|---------------------------------------|
| Anti-ErbB2                | Rabbit polyclonal        | Santacruz biotech           | Neu/C18            | 1/1000 (0.2µg/ml)  | Western-blotting; Immunoprecipitation |
| Anti-ErbB2                | Goat polyclonal          | R&D Systems                 | AF1129             | 1/1000 (0.2µg/ml)  | Immunofluorescence                    |
| Anti-Hsc70                | Mouse monoclonal         | Santacruz                   | B-6                | 1/1000 (0.2 µg/ml) | Western-blotting                      |
| Anti-β-Actin              | Mouse monoclonal Ascites | Sigma                       | AC-15              | 1/1000             | Western-blotting                      |
| Anti-Ubiquitin            | Mouse monoclonal         | Covance                     | P4D1               | 1/1000 (1 µg/ml)   | Western-blotting                      |
| Anti-LAMP-1               | Mouse monoclonal Ascites | Developmental Hybridoma     | H4A3               | 1/1000             | Immunofluorescence                    |
| Anti-phosphotyrosine      | Mouse monoclonal Ascites | Gift from Dr. Brian Drucker | 4G10               | 1/1000             | Western-blotting                      |
| Anti-p-AKT1/2/3 (Ser 473) | Rabbit polyclonal        | Santacruz                   | SC-7985-R          | 1/1000 (0.2 µg/ml) | Western-blotting                      |
| Anti-PARP                 | Mouse monoclonal         | BD Pharmingen               | 556494             | 1/500              | Western-blotting                      |
